# Supplementary material for: Growth and structural discrimination of cortical neurons on randomly oriented and vertically aligned dense carbon nanotube networks
Source: publisher site journal article supplement (doi:10.3762/bjnano.5.169), 2014-09-17
Supplement: Additional file 1 [file 2190-4286-5-169-S1.pdf]

## Supporting Information

for

### **Growth and structural discrimination of cortical neurons on randomly oriented and vertically aligned dense carbon nanotube networks**

Christoph Nick<sup>1,‡</sup>, Sandeep Yadav<sup>2,‡</sup>, Ravi Joshi<sup>2</sup>, Christiane Thielemann<sup>\*1</sup> and Jörg J. Schneider<sup>\*2</sup>

Address: <sup>1</sup>University of Applied Sciences Aschaffenburg, Department of Engineering, BioMEMS lab, Würzburger Strasse 45, 64743 Aschaffenburg, Germany and <sup>2</sup>Technische Universität Darmstadt, Fachbereich Chemie, Eduard-Zintl-Institut für Anorganische und Physikalische Chemie, Alarich-Weiss-Str. 12, 64287 Darmstadt Germany

E-mail: Christiane Thielemann\* - christiane.thielemann@h-ab.de;

Jörg J. Schneider\* - joerg.schneider@ac.chemie.tu-darmstadt.de

\* Corresponding author

‡ Equal contributors

### **Additional growth studies through SEM**

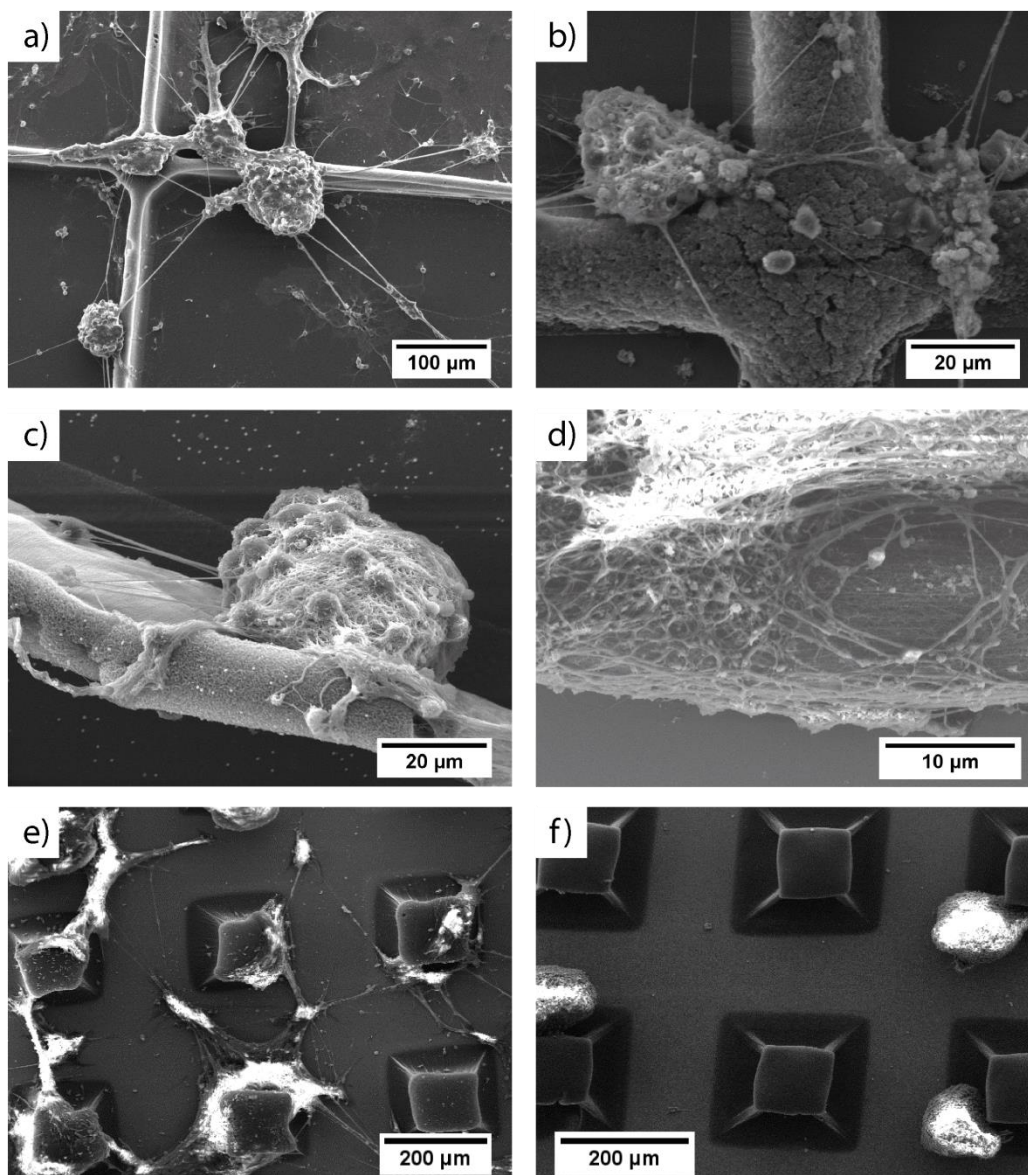

**Figure S1:** SEM pictures of neuronal cell assembly on different CNT micro architectures. Upper left a): neuronal cell assembly on a CNT cross bar structure. Upper right b): Magnified view of a neuronal cell adhesion on a cross bar CNT structure. Middle left c): Higher magnified view of a neuronal cell cluster showing its preferential adhesion on the side architecture of the CNT wall structure. Middle right d): higher magnified view of a dense cell assembly on the CNT upper rim wall structure shown in c). Lower left e): Example exemplifying a comparable preferential cell assembly of the neuron cell line R18 (Embryonic Rat Hypothalamus Cell Line R18 (RHypoE-18)) on the CNT side walls as compared to a) or c). Lower right f): Example showing the preferential cell assembly of a neuronal spheroid (from neurons of a chicken embryo) on the CNT side walls of CNT microstructured blocks.
